# Supplementary material for: Analysis of Components and Properties of Extractives from Alnus cremastogyne Pods from Different Provenances
Source: MDPI journal article supplement (doi:10.3390/molecules27227802), 2022-11-12
Supplement: s1 [file s1]

## **Supplementary File**

**Analysis of Components and Properties of Extractives from  
*Alnus cremastogyne* Pods from Different Provenances**

**Supplementary Table S1.** Radical scavenging capacity of DPPH of ethanol, petroleum ether, and ethyl acetate extractives from *Alnus cremastogyne* pods.

| Sample | Extractives Type | Fitting Equation <sup>a</sup> | R <sup>2</sup> |
|--------|------------------|-------------------------------|----------------|
| A      | Ethanol          | $y = 25.239\ln(x) + 49.325$   | 0.9596         |
|        | Petroleum ether  | $y = 34.616\ln(x) + 9.486$    | 0.9511         |
|        | Ethyl acetate    | $y = 37.898\ln(x) + 16.753$   | 0.9928         |
| B      | Ethanol          | $y = 26.025\ln(x) + 67.289$   | 0.9958         |
|        | Petroleum ether  | $y = 26.473\ln(x) + 14.942$   | 0.956          |
|        | Ethyl acetate    | $y = 37.898\ln(x) + 16.753$   | 0.9928         |
| C      | Ethanol          | $y = 26.781\ln(x) + 78.723$   | 0.9663         |
|        | Petroleum ether  | $y = 26.642\ln(x) + 17.492$   | 0.9572         |
|        | Ethyl acetate    | $y = 25.133\ln(x) + 48.208$   | 0.9836         |
| D      | Ethanol          | $y = 16.848\ln(x) + 92.452$   | 0.9294         |
|        | Petroleum ether  | $y = 20.752\ln(x) + 41.341$   | 0.8888         |
|        | Ethyl acetate    | $y = 24.84\ln(x) + 73.411$    | 0.979          |
| E      | Ethanol          | $y = 29.146\ln(x) + 40.643$   | 0.9344         |
|        | Petroleum ether  | $y = 23.617\ln(x) + 13.459$   | 0.9608         |
|        | Ethyl acetate    | $y = 29.603\ln(x) + 21.265$   | 0.9871         |
| F      | Ethanol          | $y = 22.159\ln(x) + 41.162$   | 0.9639         |
|        | Petroleum ether  | $y = 23.961\ln(x) + 11.905$   | 0.9755         |
|        | Ethyl acetate    | $y = 25.125\ln(x) + 22.636$   | 0.9834         |
| G      | Ethanol          | $y = 28.679\ln(x) + 41.234$   | 0.9327         |
|        | Petroleum ether  | $y = 35.427\ln(x) + 6.487$    | 0.9765         |
|        | Ethyl acetate    | $y = 28.899\ln(x) + 24.985$   | 0.9922         |
| H      | Ethanol          | $y = 32.034\ln(x) + 40.613$   | 0.9817         |
|        | Petroleum ether  | $y = 27.711\ln(x) + 16.196$   | 0.9578         |
|        | Ethyl acetate    | $y = 30.008\ln(x) + 28.899$   | 0.9859         |
| I      | Ethanol          | $y = 24.244\ln(x) + 43.263$   | 0.9874         |
|        | Petroleum ether  | $y = 24.046\ln(x) + 17.073$   | 0.9694         |
|        | Ethyl acetate    | $y = 34.504\ln(x) + 18.159$   | 0.9376         |
| J      | Ethanol          | $y = 21.866\ln(x) + 87.022$   | 0.9152         |
|        | Petroleum ether  | $y = 21.948\ln(x) + 30.286$   | 0.9212         |
|        | Ethyl acetate    | $y = 19.568\ln(x) + 26.452$   | 0.9573         |
| K      | Ethanol          | $y = 25.149\ln(x) + 32.666$   | 0.8889         |
|        | Petroleum ether  | $y = 26.099\ln(x) + 8.1294$   | 0.9355         |
|        | Ethyl acetate    | $y = 28.823\ln(x) + 15.736$   | 0.9497         |
| L      | Ethanol          | $y = 26.516\ln(x) + 49.365$   | 0.979          |
|        | Petroleum ether  | $y = 22.507\ln(x) + 12.615$   | 0.9471         |
|        | Ethyl acetate    | $y = 31.412\ln(x) + 28.462$   | 0.9981         |

<sup>a</sup> In the regression equation, y is the removal rate (%) and x is the sample concentration (mg/mL).

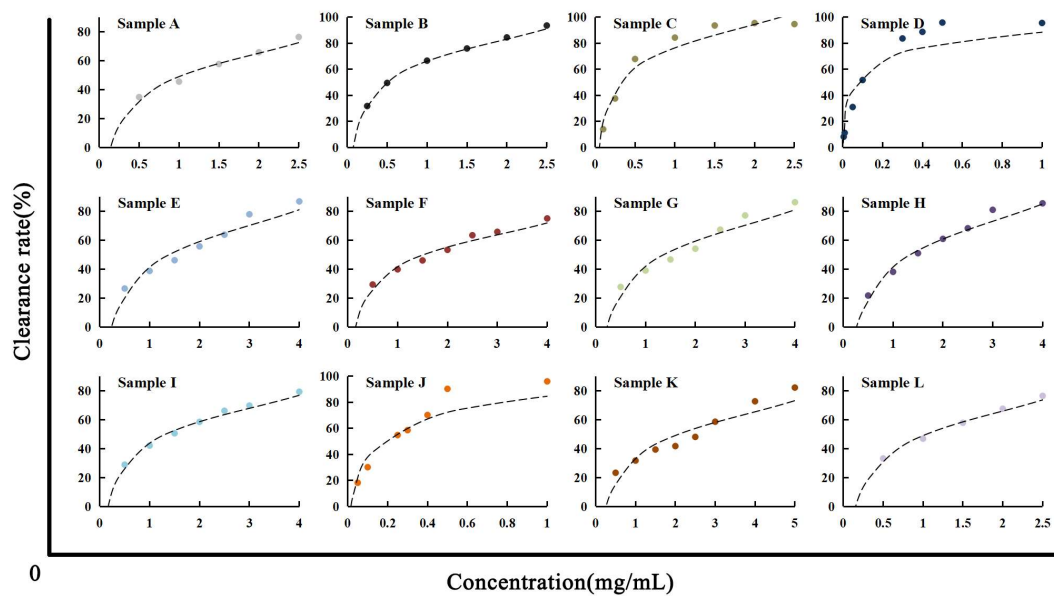

**Supplementary Figure S1.** Elimination of DPPH free radicals by ethanol extractive from *Alnus cremastogyne* pods.

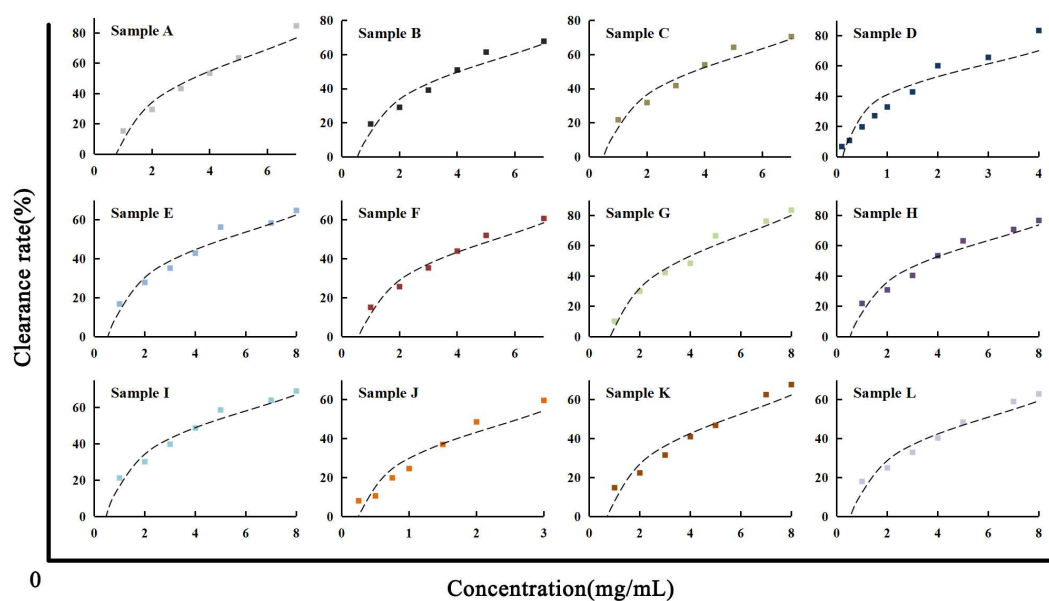

**Supplementary Figure S2.** Elimination of DPPH free radicals by petroleum ether extractive from *Alnus cremastogyne* pods.

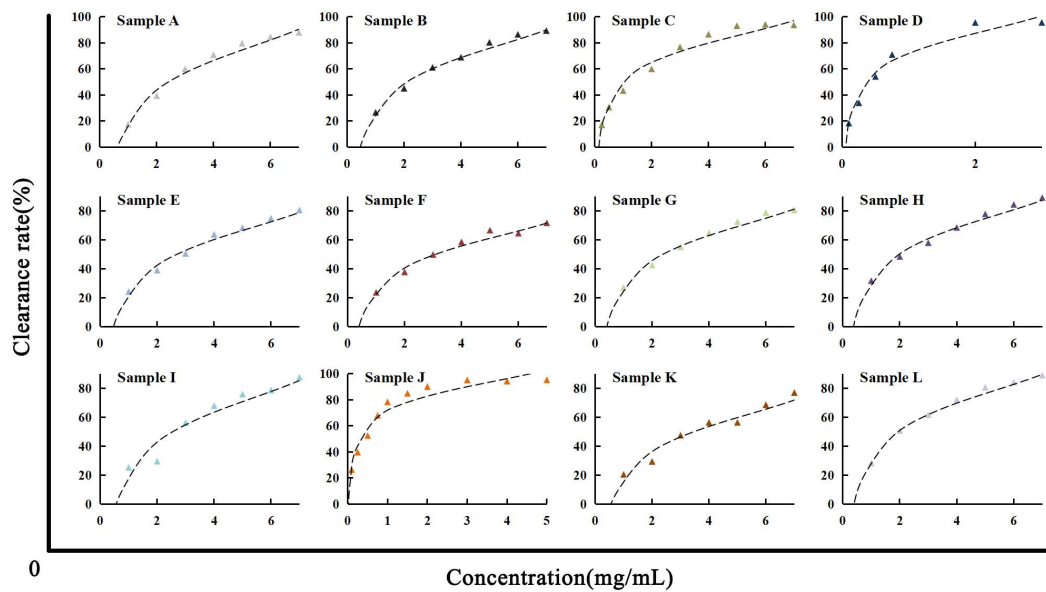

**Supplementary Figure S3.** Elimination of DPPH free radicals by ethyl acetate extractive from *Alnus cremastogyne* pods.
